# Supplementary material for: Synergistic improvement of pH-universal hydrogen evolution through B, N dual-doped Mo 2 C
Source: Royal Society of Chemistry journal article supplement (doi:10.1039/d4ta07177h), 2024-12-13
Supplement: d4ta07177h1.pdf [file d4ta07177h1.pdf]

## Supporting Information

### **Synergistic Improvement of pH-Universal Hydrogen Evolution through B, N Dual-Doped Mo<sub>2</sub>C**

Shuaipeng Wang,<sup>a</sup> Shengli Zhu,<sup>a,b,c</sup> Zhenduo Cui,<sup>a,b,c</sup> Zhaoyang Li,<sup>a,b,c</sup> Shuilin Wu,<sup>a,d</sup> Wence Xu,<sup>a,b,c</sup> Zhonghui Gao,<sup>a,b,c</sup> Yanqin Liang,<sup>\*a,b,c</sup> and Hui Jiang<sup>\*a,b,c</sup>

a. School of Materials Science and Engineering, Tianjin University, Tianjin 300350, China.

b. Tianjin Key Laboratory of Composite and Functional Materials, Tianjin 300350, China.

c. Key Laboratory of Advanced Ceramics and Machining Technology, Ministry of Education  
Tianjin 300350, China.

d. School of Materials Science & Engineering, Peking University, Beijing 100871, China

(\*Corresponding author: e-mail: yqliang@tju.edu.cn, h.jiang@tju.edu.cn)

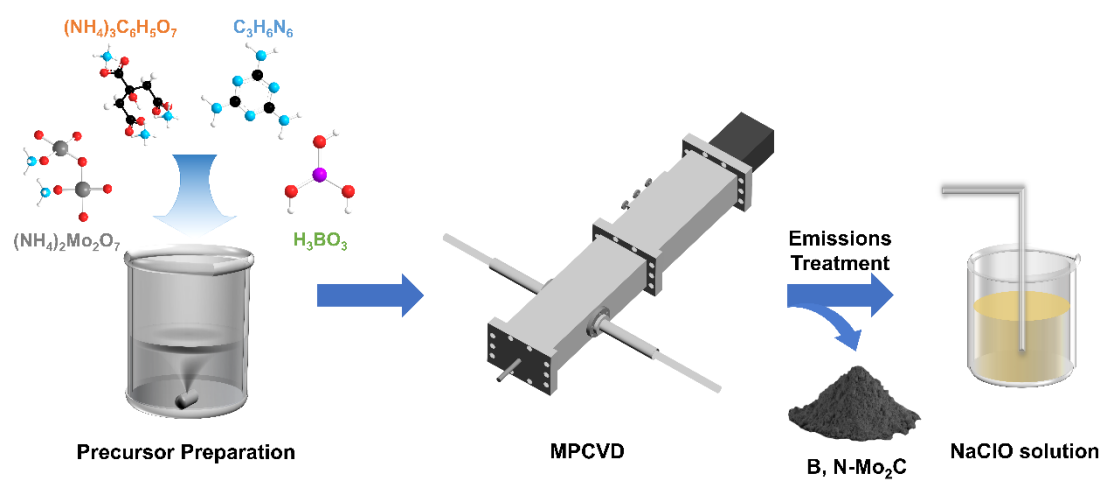

**Fig. S1** Reaction flowchart of the experiment.

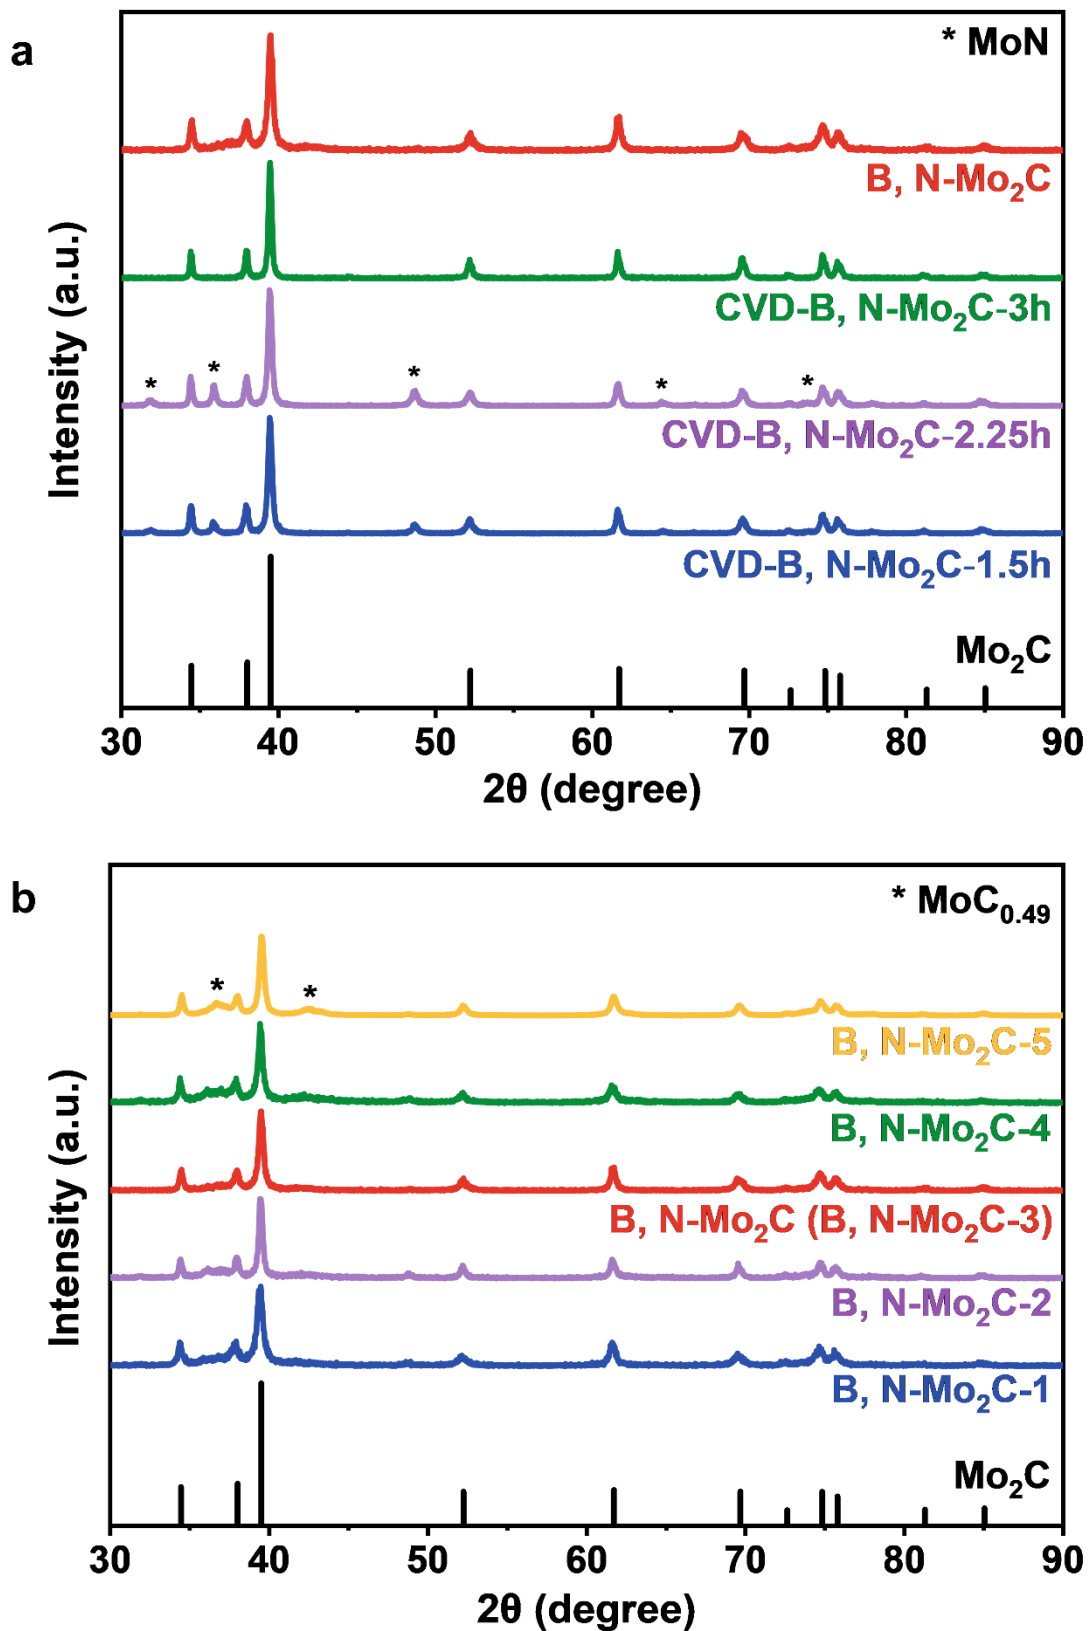

Fig. S2 XRD patterns of (a) CVD-B, N-Mo<sub>2</sub>C-1.5h, CVD-B, N-Mo<sub>2</sub>C-2.25h, CVD-B, N-Mo<sub>2</sub>C-3h, and B, N-Mo<sub>2</sub>C. (b) B, N-Mo<sub>2</sub>C-X (X stands for the ratio of boric acid dosage).

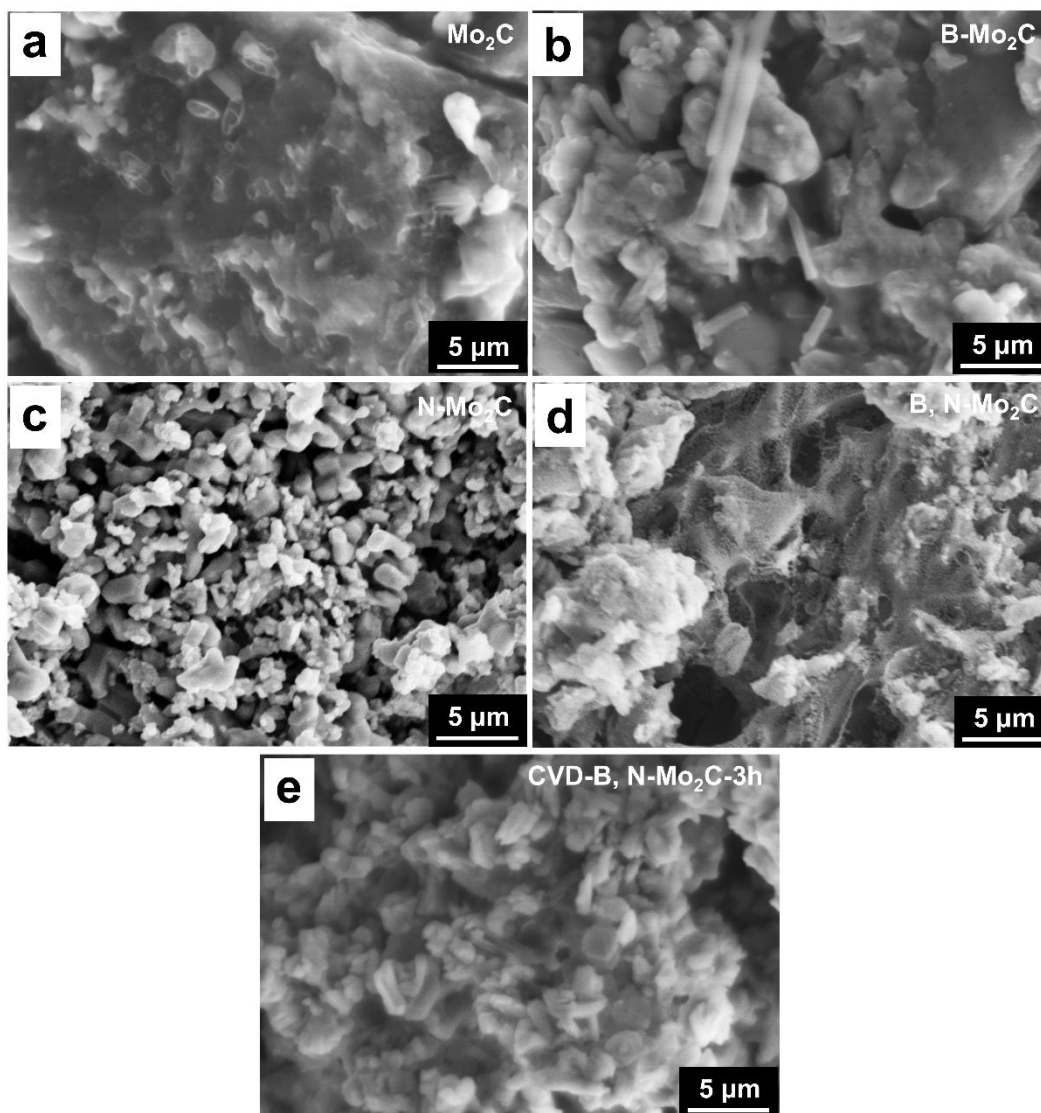

**Fig. S3** SEM image of (a)  $\text{Mo}_2\text{C}$ , (b)  $\text{B-Mo}_2\text{C}$ , (c)  $\text{N-Mo}_2\text{C}$ , (d)  $\text{B, N-Mo}_2\text{C}$ , and (e)  $\text{CVD-B, N-Mo}_2\text{C-3h}$ .

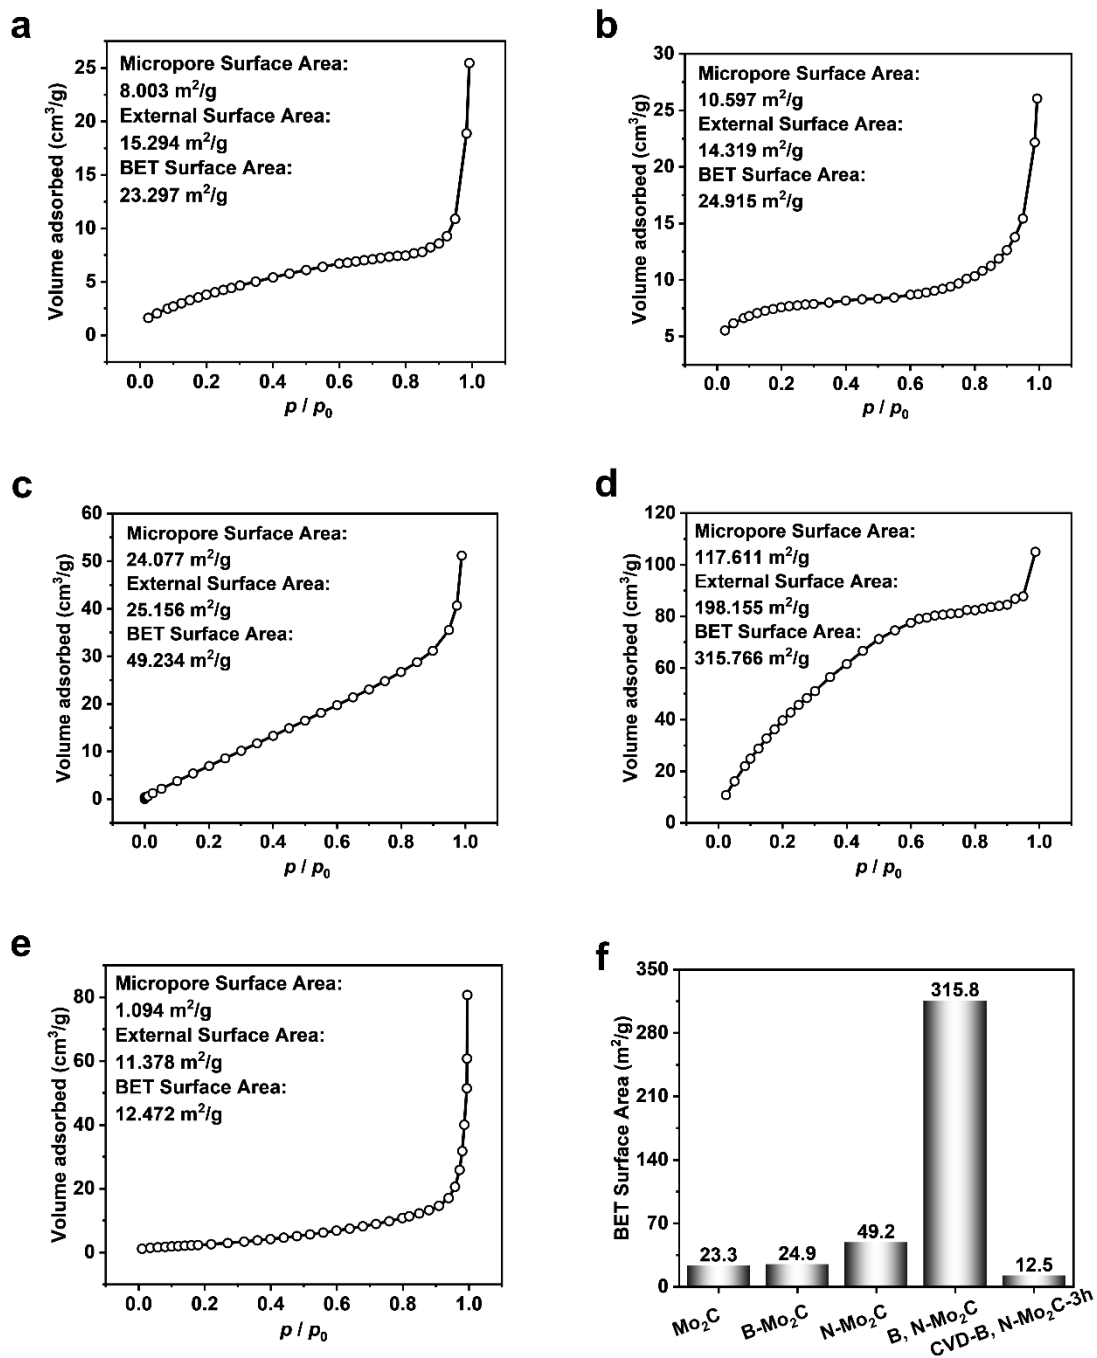

**Fig. S4** N<sub>2</sub> adsorption isotherms of (a) Mo<sub>2</sub>C, (b) B-Mo<sub>2</sub>C, (c) N-Mo<sub>2</sub>C, (d) B, N-Mo<sub>2</sub>C, (e) CVD-B, N-Mo<sub>2</sub>C-3h, and (f) BET surface area.

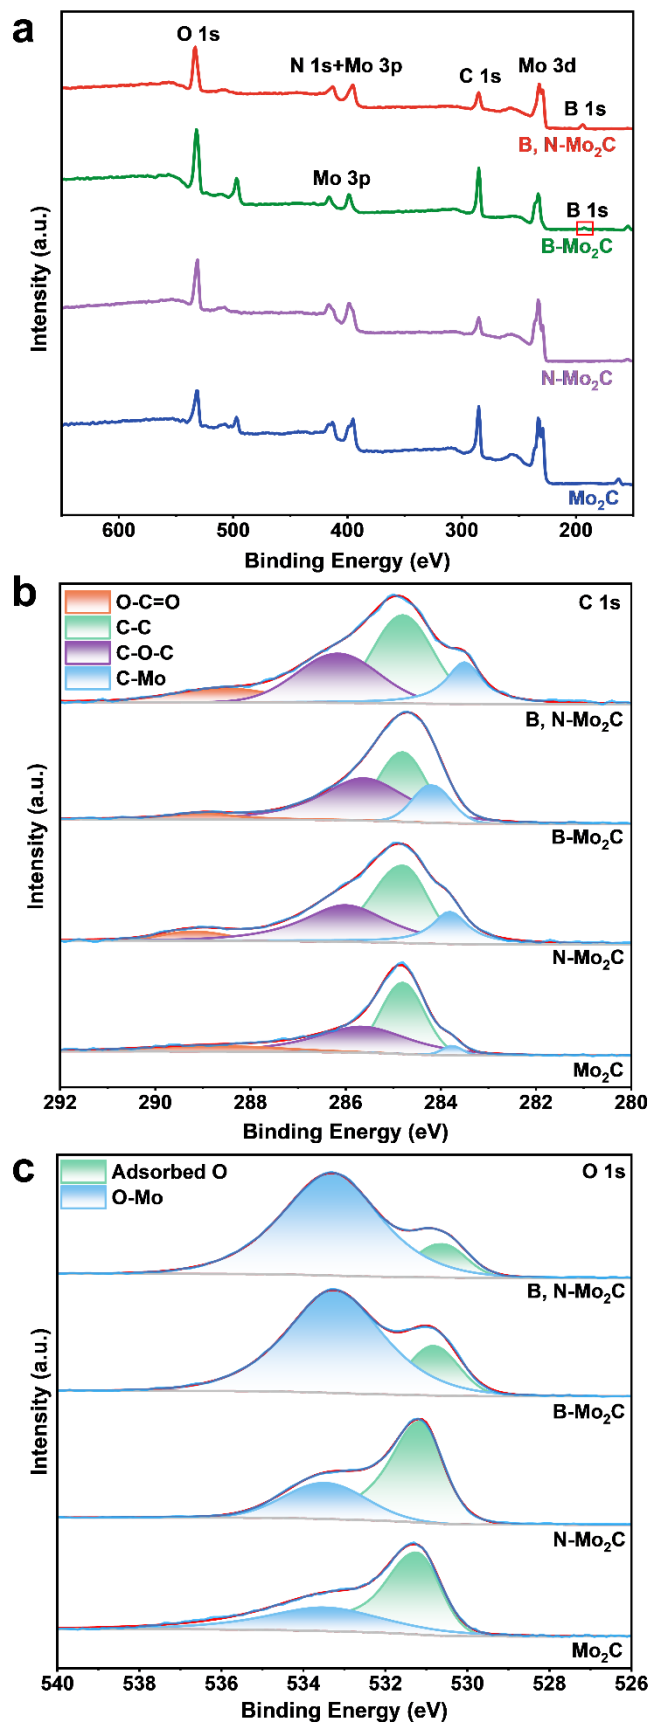

**Fig. S5** High-resolution XPS spectra. (a) survey spectra, (b) C 1s and (c) O 1s spectra of Mo<sub>2</sub>C, N-Mo<sub>2</sub>C, B-Mo<sub>2</sub>C, and B, N-Mo<sub>2</sub>C.

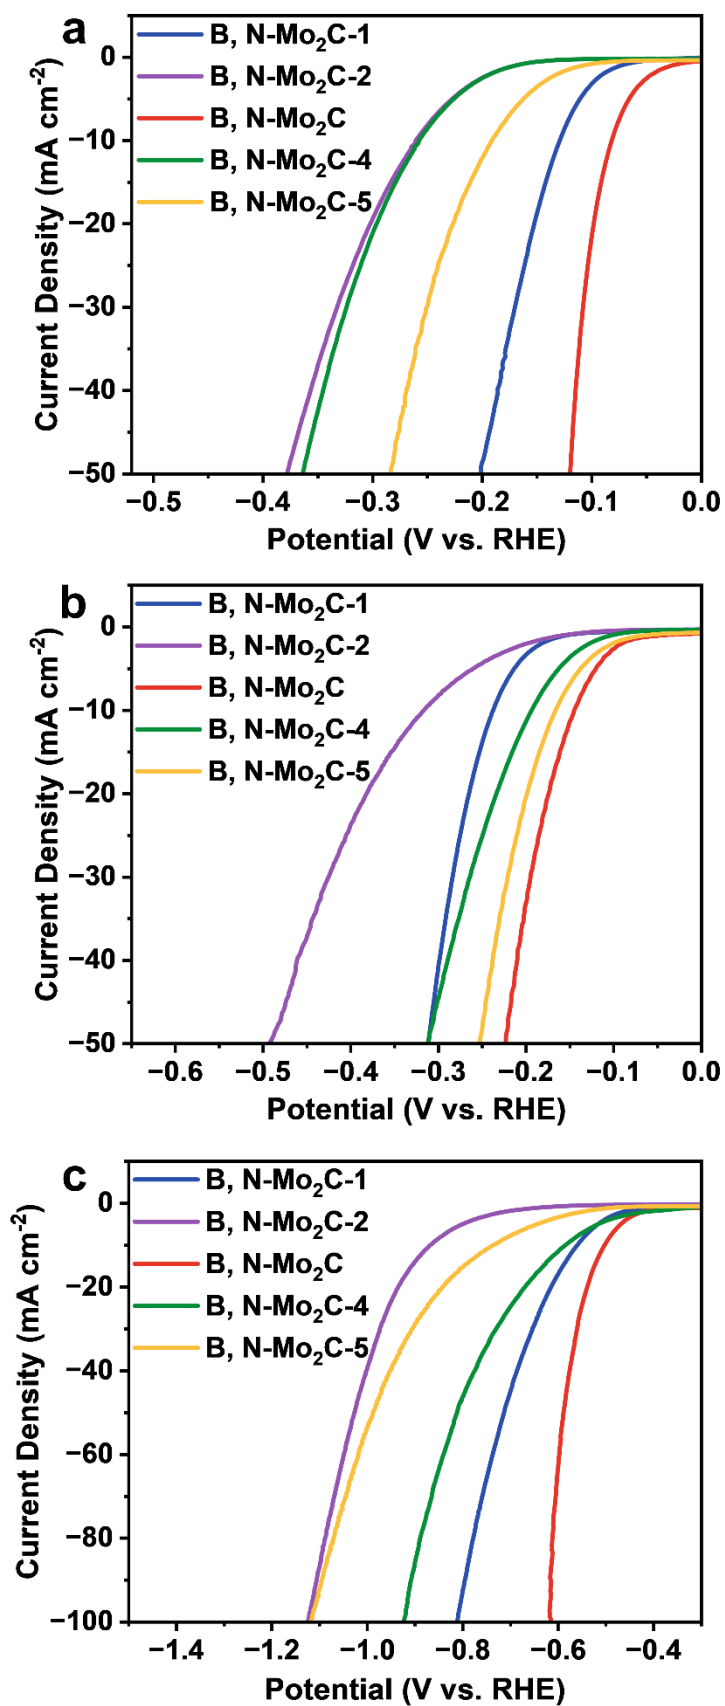

Fig. S6 HER performance of different samples in Polarization curves. (a) 1.0 M KOH, (b) 0.5 M H<sub>2</sub>SO<sub>4</sub>, and (c) 0.5 M Na<sub>2</sub>SO<sub>4</sub>.

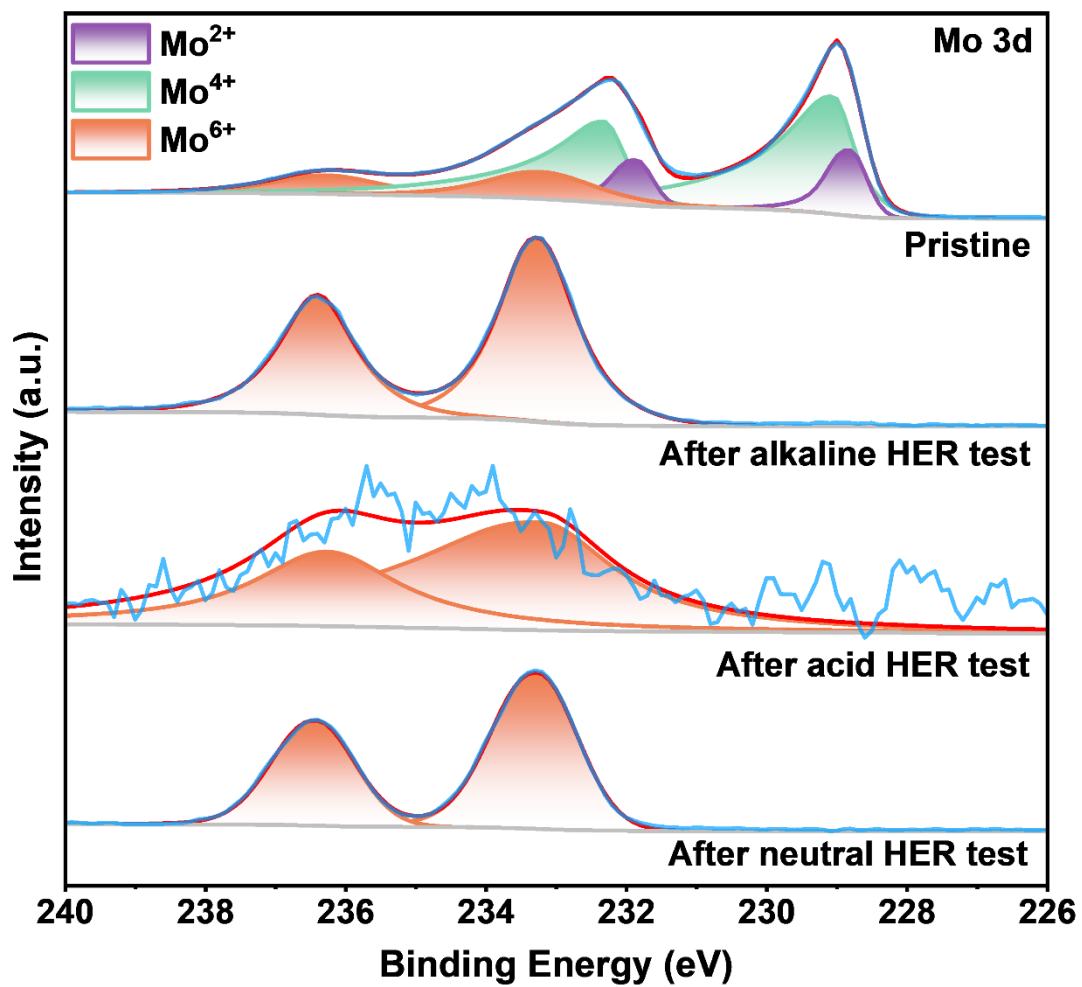

Fig. S7 XPS spectra of Mo 3d in B, N-Mo<sub>2</sub>C before and after HER test in different environments.



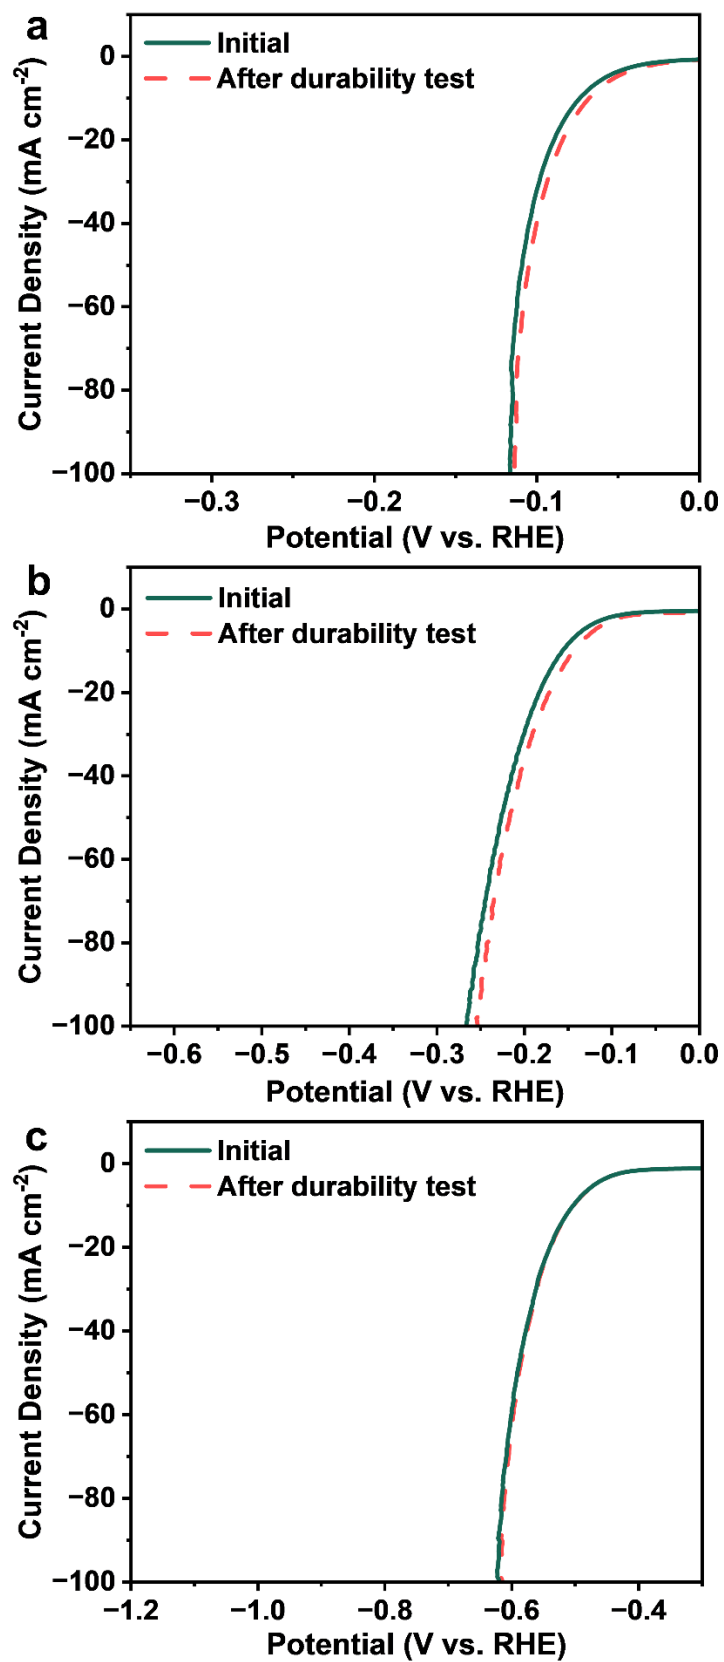

Fig. S8 Polarization curves of B, N-Mo<sub>2</sub>C before and after I-t durability tests in (a) 1.0 M KOH, (b) 0.5 M H<sub>2</sub>SO<sub>4</sub>, and (c) 0.5 M Na<sub>2</sub>SO<sub>4</sub>.

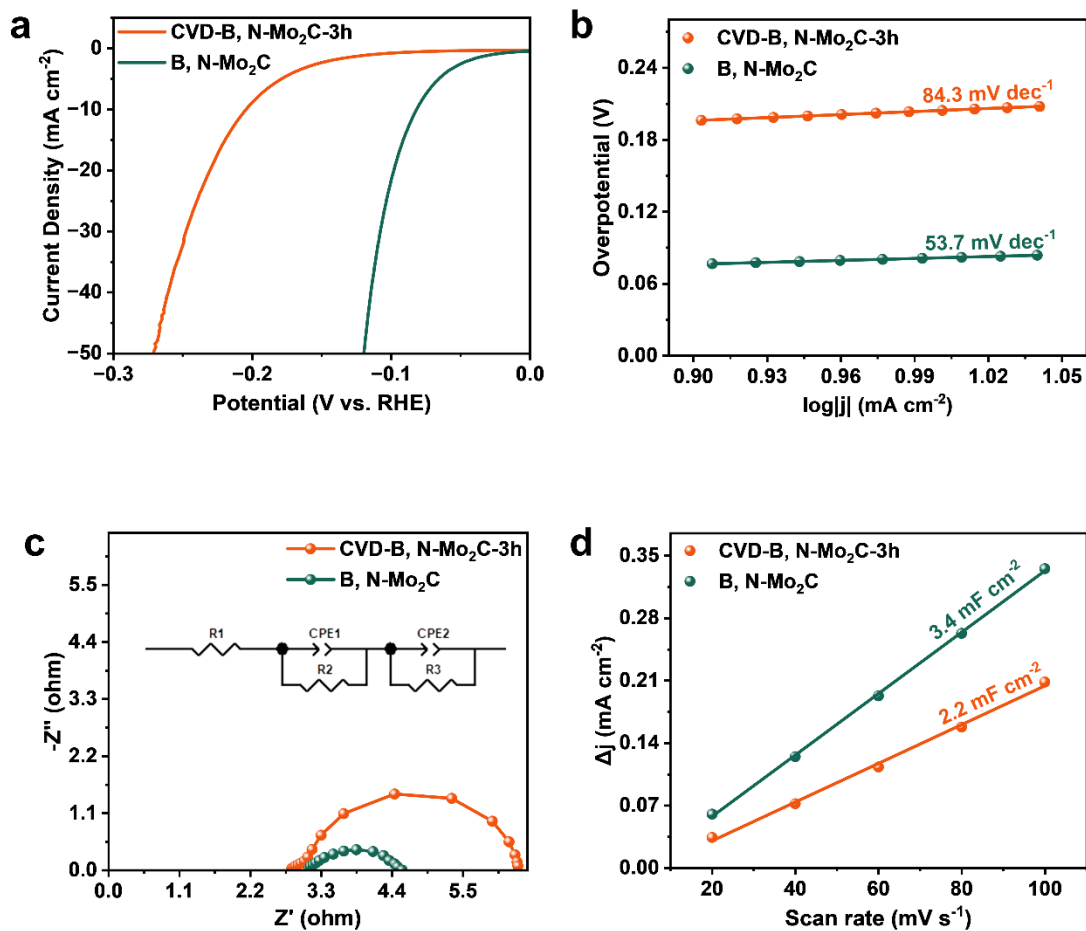

**Fig. S9** HER performance of different samples in 1.0 M KOH. (a) Polarization curves, (b) Tafel plots, (c) Nyquist plots collected at the overpotential of 100 mV, and (d) Capacitive currents as a function of scan rates with various rates from 20 to 100  $\text{mV s}^{-1}$ .

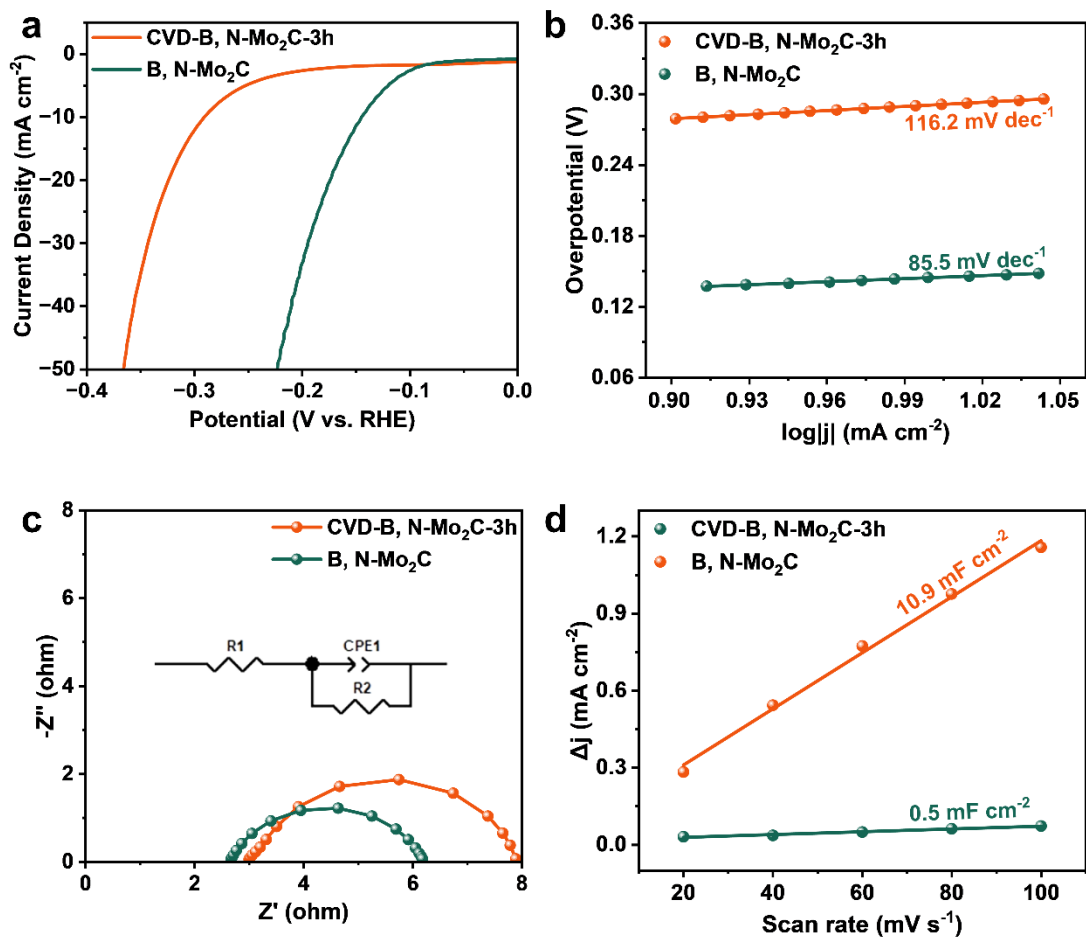

**Fig. S10** HER performance of different samples in 0.5 M H<sub>2</sub>SO<sub>4</sub>. (a) Polarization curves, (b) Tafel plots, (c) Nyquist plots collected at the overpotential of 200 mV, and (d) Capacitive currents as a function of scan rates with various rates from 20 to 100  $\text{mV s}^{-1}$ .

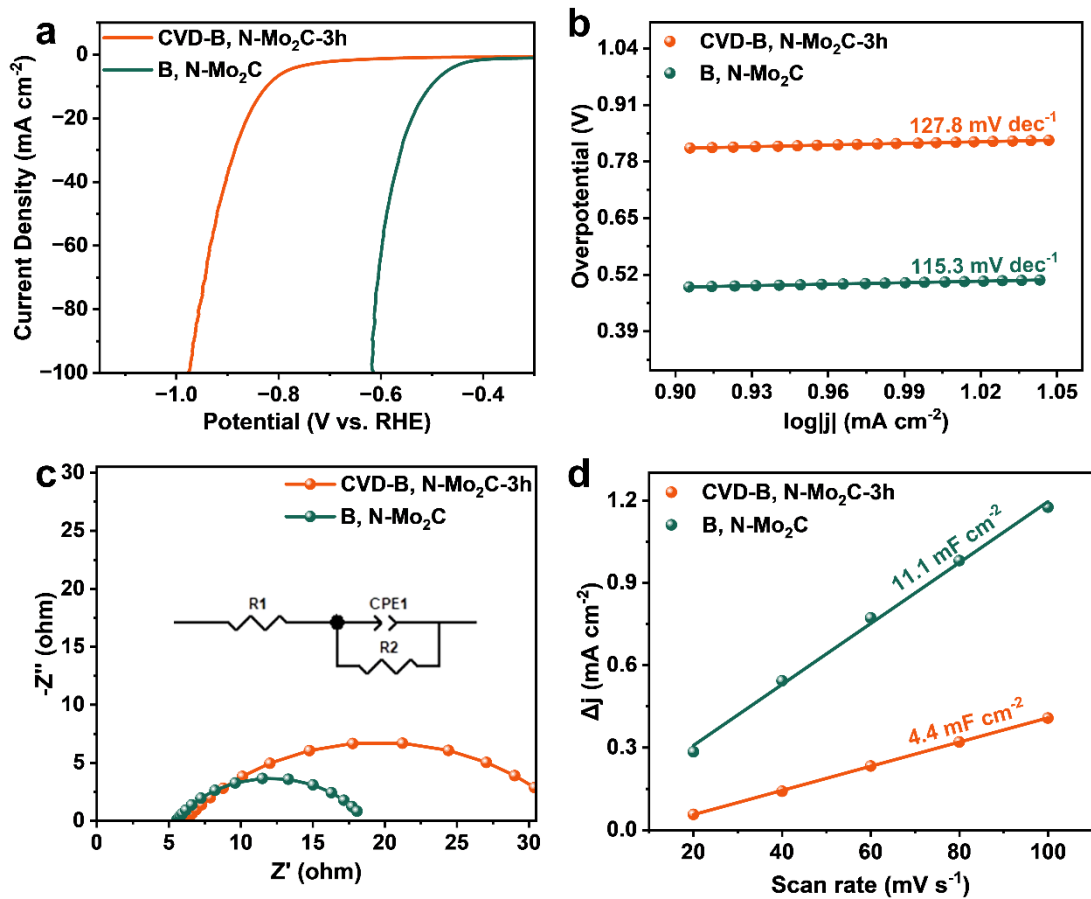

**Fig. S11** HER performance of different samples in 0.5 M Na<sub>2</sub>SO<sub>4</sub>. (a) Polarization curves, (b) Tafel plots, (c) Nyquist plots collected at the overpotential of 600 mV, and (d) Capacitive currents as a function of scan rates with various rates from 20 to 100  $\text{mV s}^{-1}$ .

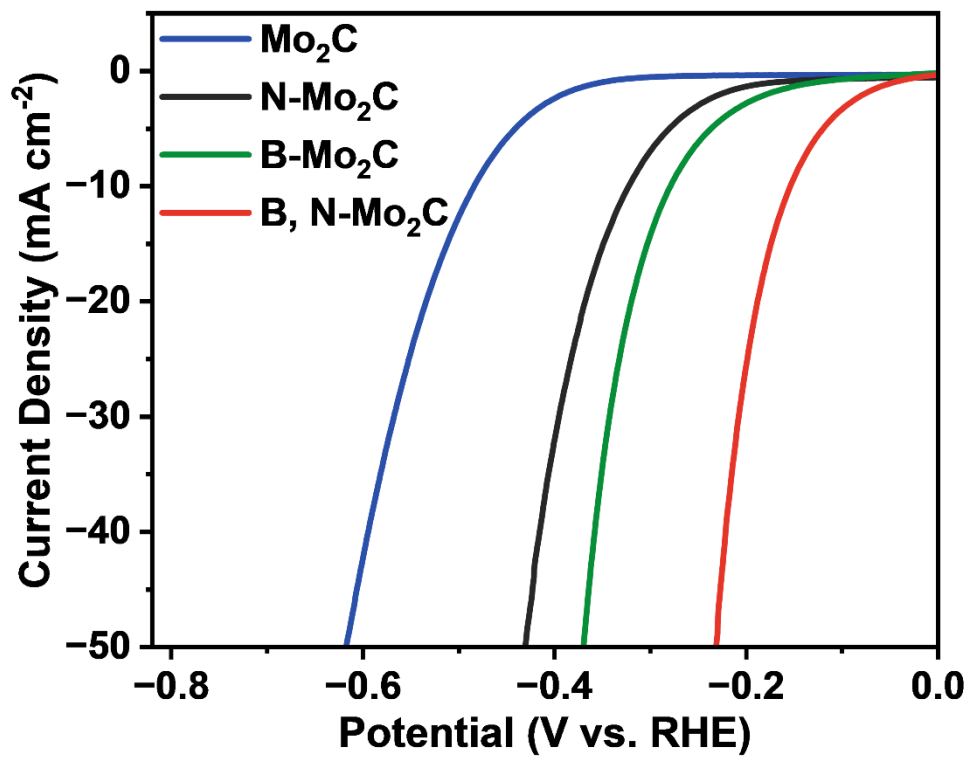

Fig. S12 HER performance of different samples in 0.5 M H<sub>2</sub>SO<sub>4</sub>. (The counter electrode is a carbon rod.)

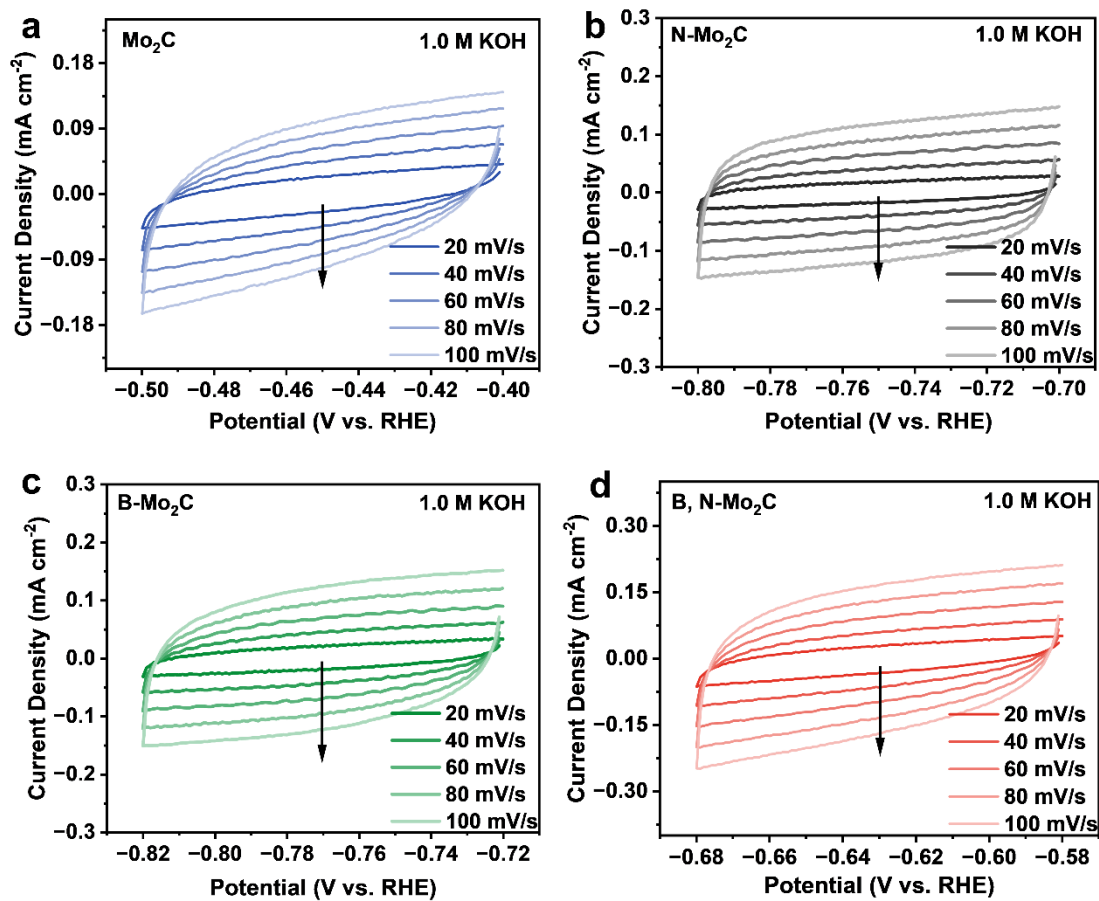

Fig. S13 (a-d) Cyclic voltammetry curves for  $\text{Mo}_2\text{C}$ , N- $\text{Mo}_2\text{C}$ , B- $\text{Mo}_2\text{C}$ , and B, N- $\text{Mo}_2\text{C}$  at different scan rates for HER in 1.0 M KOH (20-100  $\text{mV s}^{-1}$ ).

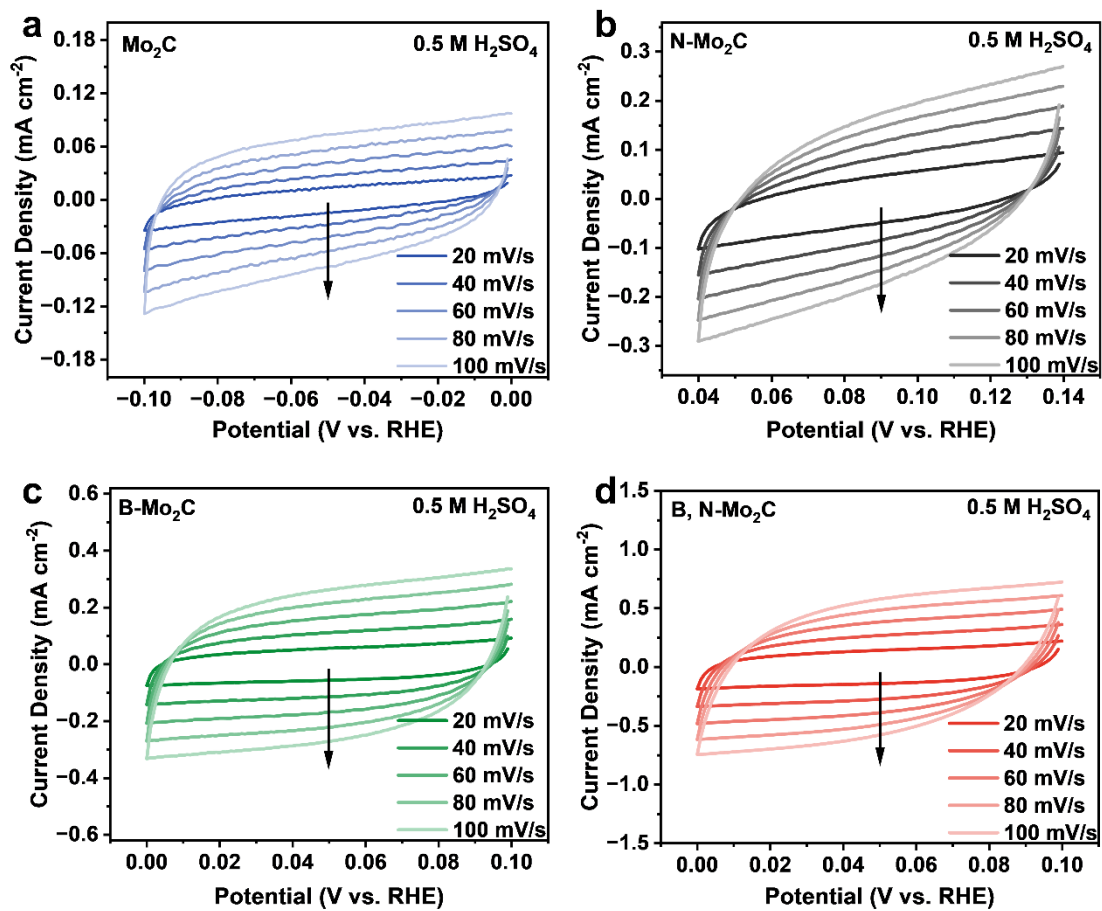

**Fig. S14** (a-d) Cyclic voltammetry curves for Mo<sub>2</sub>C, N-Mo<sub>2</sub>C, B-Mo<sub>2</sub>C, and B, N-Mo<sub>2</sub>C at different scan rates for HER in 0.5 M H<sub>2</sub>SO<sub>4</sub> (20-100 mV s<sup>-1</sup>).

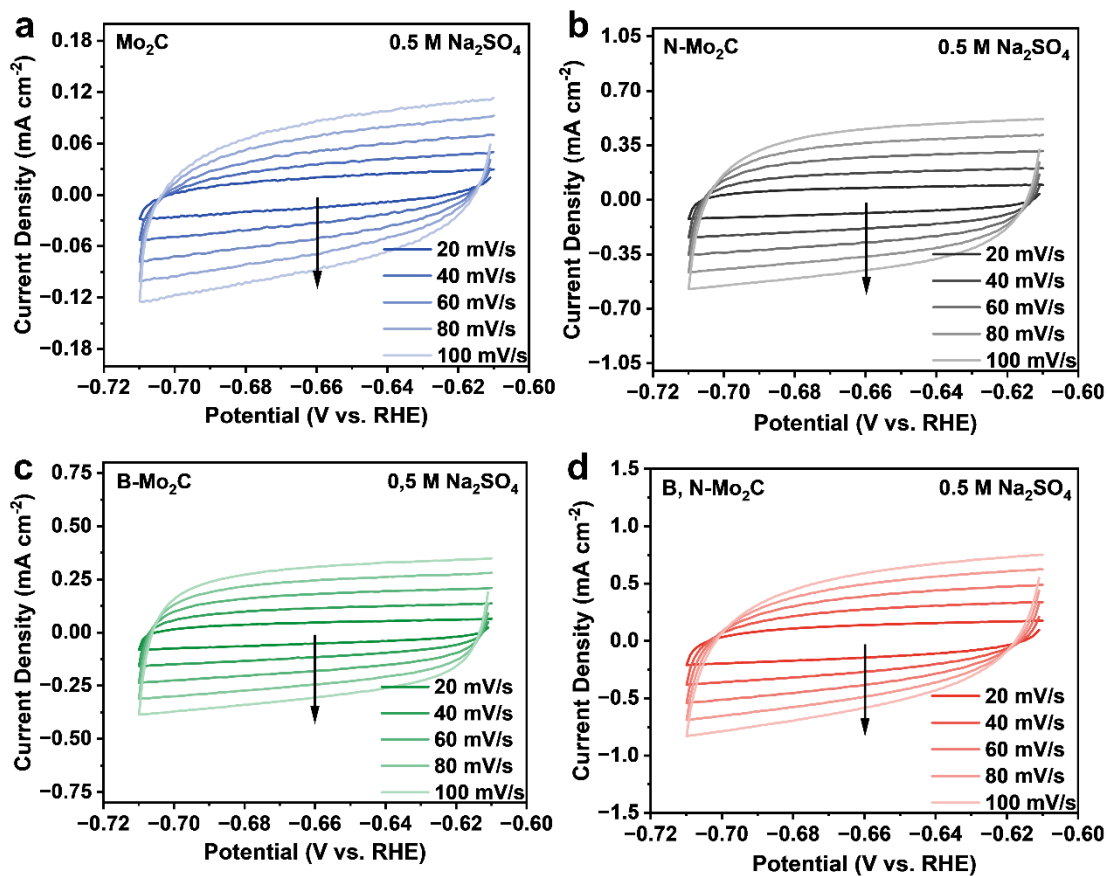

Fig. S15 (a-d) Cyclic voltammety curves for Mo<sub>2</sub>C, N-Mo<sub>2</sub>C, B-Mo<sub>2</sub>C, and B, N-Mo<sub>2</sub>C at different scan rates for HER in 0.5 M Na<sub>2</sub>SO<sub>4</sub> (20-100 mV s<sup>-1</sup>).



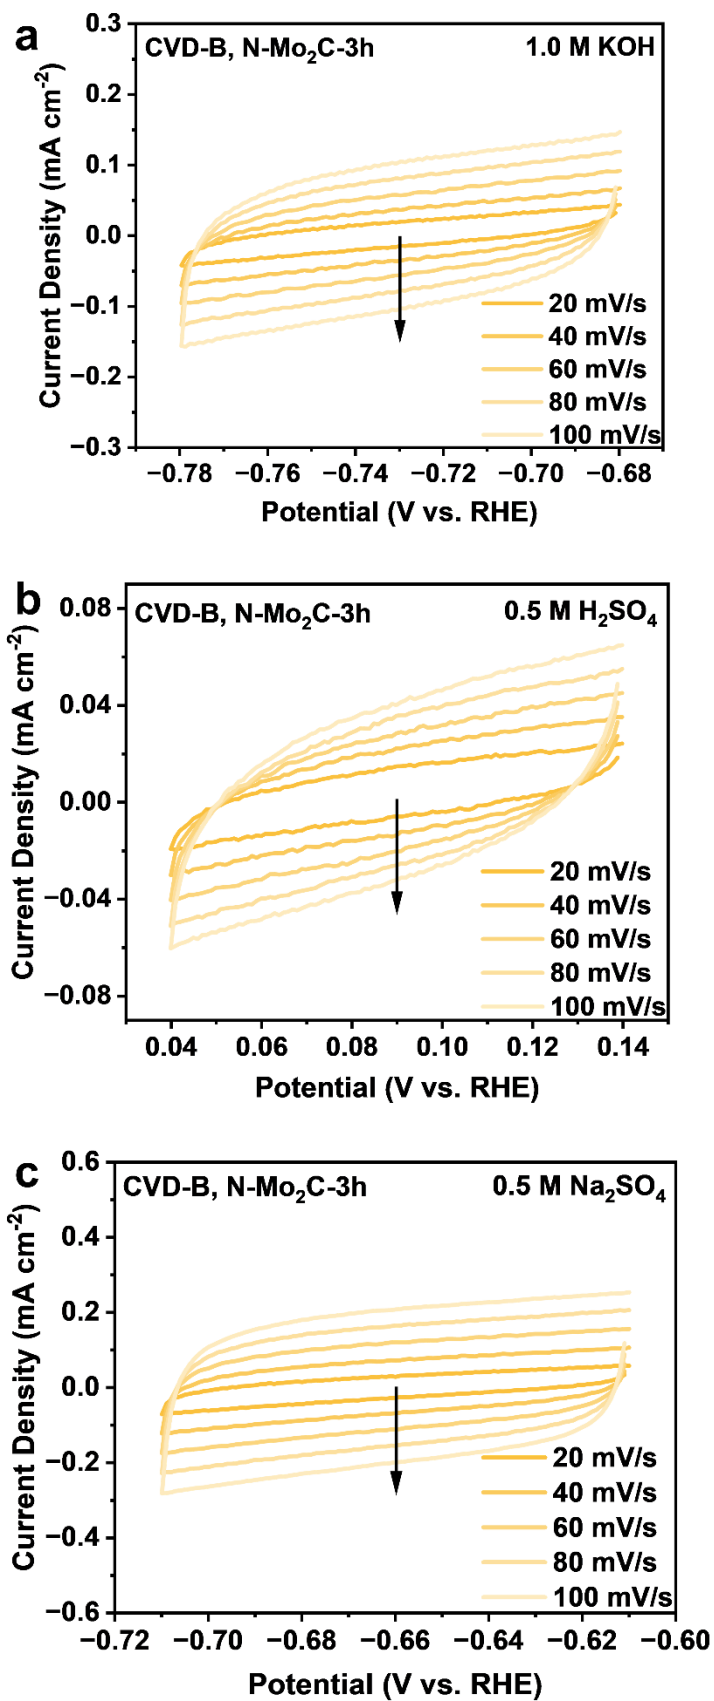

**Fig. S16** (a-c) Cyclic voltammety curves for CVD-B, N-Mo<sub>2</sub>C-3h at different pH for HER in 1.0 M KOH, 0.5 M H<sub>2</sub>SO<sub>4</sub>, and 0.5 M Na<sub>2</sub>SO<sub>4</sub> (20-100 mV s<sup>-1</sup>).

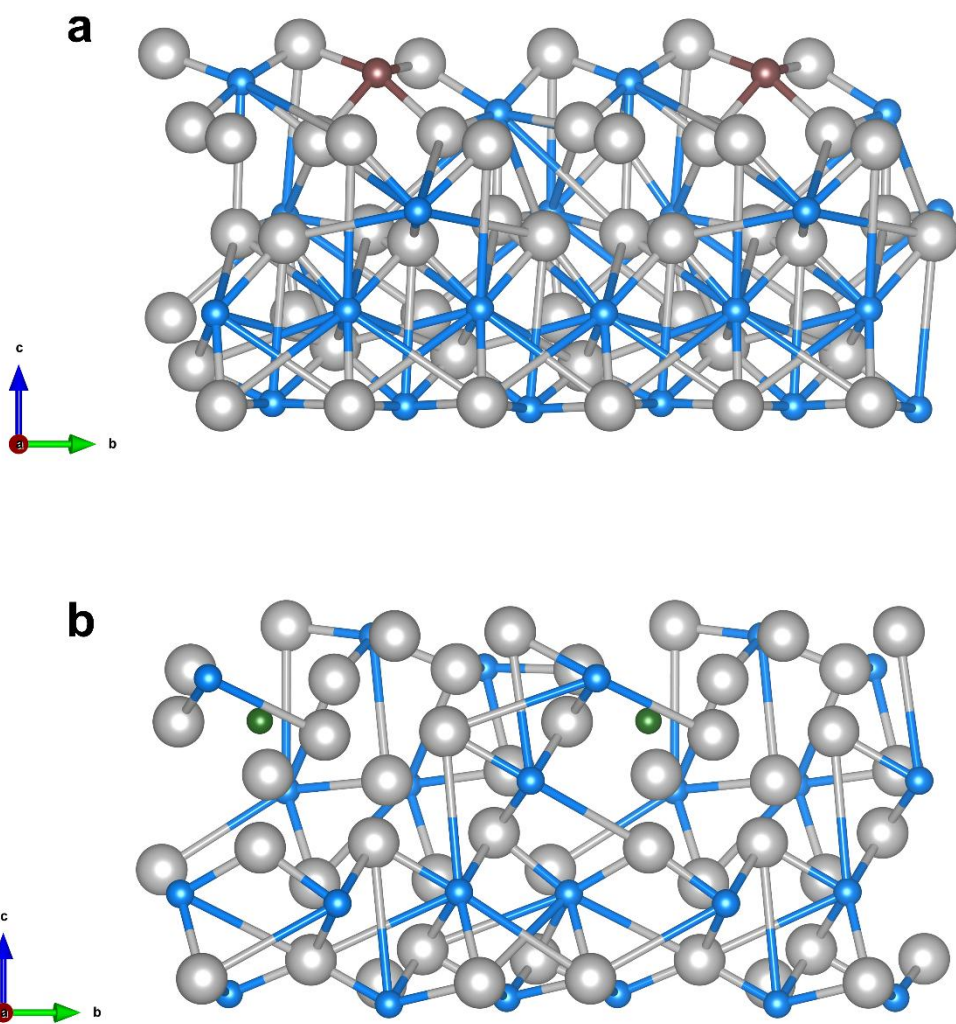

**Fig. S17** Optimized geometric structures of (a) N-Mo<sub>2</sub>C and (b) B-Mo<sub>2</sub>C.

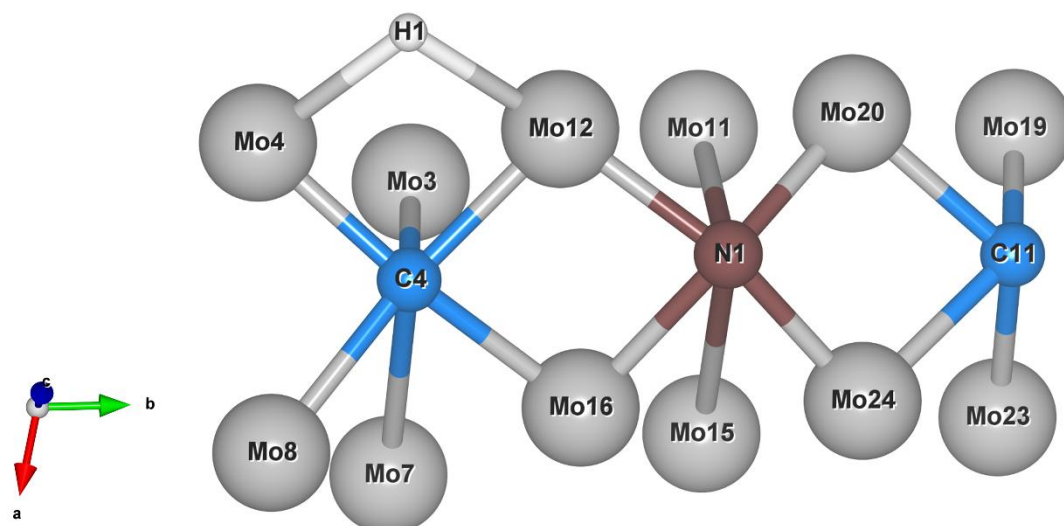

Figure S18 H\* adsorption of N-Mo<sub>2</sub>C.

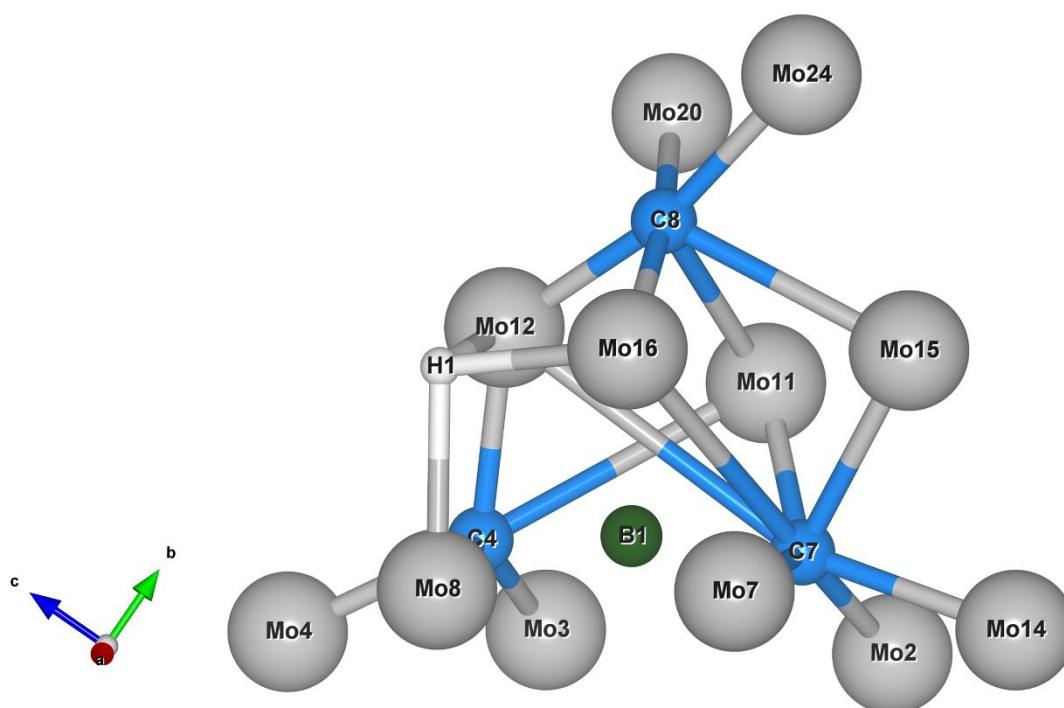

Fig. S19 H\* adsorption of B-Mo<sub>2</sub>C.

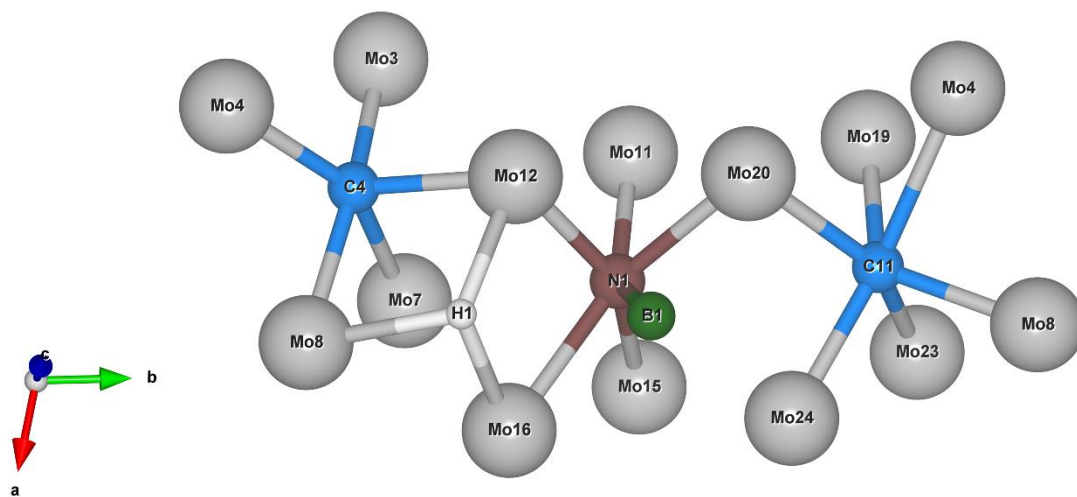

**Fig. S20** H\* adsorption of B, N-Mo<sub>2</sub>C.

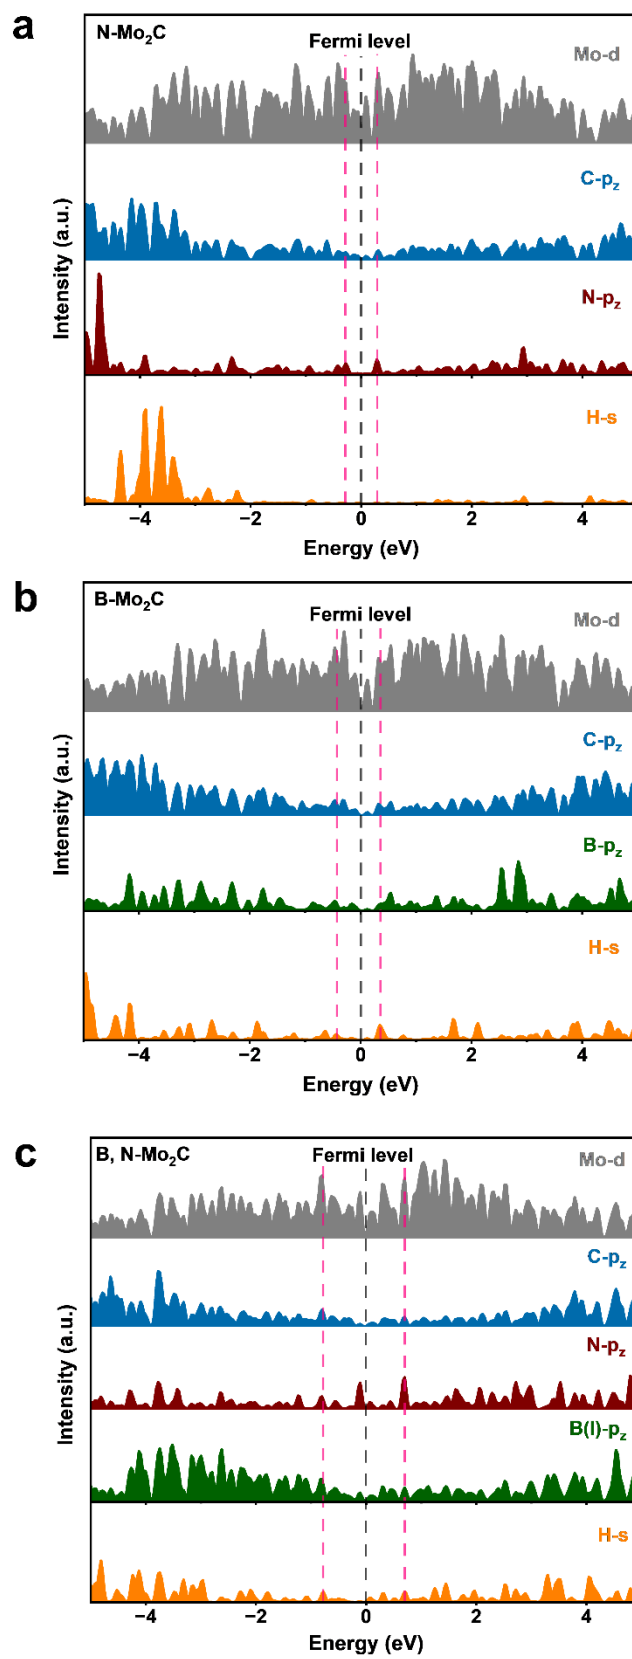

**Fig. S21** PDOS of Mo, C, B, N and H atoms in the (a) N-Mo<sub>2</sub>C, (b) B-Mo<sub>2</sub>C, and (c) B, N-Mo<sub>2</sub>C structure after adsorption.

**Table S1** Comparison of time and drug costs of B, N-Mo<sub>2</sub>C with other reported Boron and Nitrogen co-doped Mo<sub>2</sub>C-based electrocatalysts.

| Catalysts                   | Time       | Drug costs( ¥ ) | Reference        |
|-----------------------------|------------|-----------------|------------------|
| <b>B, N-Mo<sub>2</sub>C</b> | <b>1 h</b> | <b>0.231</b>    | <b>This work</b> |
| Mo <sub>2</sub> C@BCN       | 7.5 h      | 2876.3184       | 1                |
| B, N-Mo <sub>2</sub> C/NPNC | 5.8 h      | 2.152           | 2                |

**Table S2** Comparison of productivity of B, N-Mo<sub>2</sub>C produced through the different equipment and different time. (Product yield was obtained by calculating the mass ratio of the obtained products to the reactants.)

| Equipment    | Time       | Quality before reaction | Quality after reaction | Product yield |
|--------------|------------|-------------------------|------------------------|---------------|
| <b>MPCVD</b> | <b>1 h</b> | <b>0.2 g</b>            | <b>0.0636 g</b>        | <b>31.8 %</b> |
| CVD          | 1.5 h      | 0.2 g                   | 0.0649 g               | 32.5 %        |
| CVD          | 2.25 h     | 0.2 g                   | 0.0616 g               | 30.8 %        |
| <b>CVD</b>   | <b>3 h</b> | <b>0.2 g</b>            | <b>0.0572 g</b>        | <b>28.6 %</b> |

**Table S3** Mass percentage of elements tested by energy dispersive spectrometer (EDS).

|                             | Mo     | C      | B     | N     |
|-----------------------------|--------|--------|-------|-------|
| <b>Mo<sub>2</sub>C</b>      | 29.48% | 70.52% |       |       |
| <b>N-Mo<sub>2</sub>C</b>    | 49.55% | 47.83% |       | 2.62% |
| <b>B-Mo<sub>2</sub>C</b>    | 18.48% | 75.80% | 5.72% |       |
| <b>B, N-Mo<sub>2</sub>C</b> | 46.37% | 44.35% | 6.82% | 2.46% |

**Table S4** EIS parameters of different catalysts for HER.

|              |                     | <b>Mo<sub>2</sub>C</b> | <b>N-Mo<sub>2</sub>C</b> | <b>B-Mo<sub>2</sub>C</b> | <b>B, N-Mo<sub>2</sub>C</b> | <b>CVD-B, N-Mo<sub>2</sub>C-3h</b> |
|--------------|---------------------|------------------------|--------------------------|--------------------------|-----------------------------|------------------------------------|
| <b>pH=14</b> | R <sub>s</sub> (Ω)  | 2.88                   | 3.14                     | 2.55                     | 3.11                        | 2.82                               |
|              | R <sub>ct</sub> (Ω) | 18.02                  | 5.17                     | 3.00                     | 1.45                        | 3.22                               |
| <b>pH=0</b>  | R <sub>s</sub> (Ω)  | 2.43                   | 2.55                     | 2.70                     | 2.64                        | 2.98                               |
|              | R <sub>ct</sub> (Ω) | 403.30                 | 5.52                     | 16.77                    | 3.57                        | 4.70                               |
| <b>pH=7</b>  | R <sub>s</sub> (Ω)  | 5.84                   | 6.26                     | 5.91                     | 5.53                        | 6.14                               |
|              | R <sub>ct</sub> (Ω) | 131.50                 | 63.44                    | 73.14                    | 13.13                       | 26.97                              |

**Table S5** Bader charge analysis before and after H<sup>\*</sup> adsorption in N-Mo<sub>2</sub>C.

| <b>Atomic number</b> | <b>Bader charge before adsorption</b> | <b>Bader charge after adsorption</b> | <b>Net charge</b> |
|----------------------|---------------------------------------|--------------------------------------|-------------------|
| Mo <sub>3</sub>      | 13.516                                | 13.473                               | -0.043            |
| Mo <sub>4</sub>      | 13.484                                | 13.330                               | -0.155            |
| Mo <sub>7</sub>      | 13.612                                | 13.588                               | -0.024            |
| Mo <sub>8</sub>      | 13.446                                | 13.437                               | -0.010            |
| Mo <sub>11</sub>     | 13.510                                | 13.515                               | 0.005             |
| Mo <sub>12</sub>     | 13.414                                | 13.244                               | -0.170            |
| Mo <sub>15</sub>     | 13.538                                | 13.544                               | 0.006             |
| Mo <sub>16</sub>     | 13.461                                | 13.439                               | -0.022            |
| Mo <sub>19</sub>     | 13.406                                | 13.423                               | 0.017             |
| Mo <sub>20</sub>     | 13.584                                | 13.486                               | -0.098            |
| Mo <sub>23</sub>     | 13.410                                | 13.399                               | -0.010            |
| Mo <sub>24</sub>     | 13.422                                | 13.434                               | 0.011             |
| C <sub>4</sub>       | 5.232                                 | 5.206                                | -0.027            |
| C <sub>11</sub>      | 5.291                                 | 5.324                                | 0.033             |
| N                    | 6.247                                 | 6.284                                | 0.037             |
| H                    | 1                                     | 1.472                                | 0.472             |

**Table S6** Bader charges analysis before and after H<sup>\*</sup> adsorption in B-Mo<sub>2</sub>C.

| <b>Atomic number</b> | <b>Bader charge before adsorption</b> | <b>Bader charge after adsorption</b> | <b>Net charge</b> |
|----------------------|---------------------------------------|--------------------------------------|-------------------|
| Mo <sub>2</sub>      | 13.269                                | 13.274                               | 0.004             |
| Mo <sub>3</sub>      | 13.575                                | 13.597                               | 0.023             |
| Mo <sub>4</sub>      | 13.594                                | 13.572                               | -0.021            |
| Mo <sub>7</sub>      | 13.770                                | 13.716                               | -0.054            |
| Mo <sub>8</sub>      | 13.491                                | 13.407                               | -0.084            |
| Mo <sub>11</sub>     | 13.402                                | 13.383                               | -0.020            |
| Mo <sub>12</sub>     | 13.440                                | 13.269                               | -0.171            |
| Mo <sub>14</sub>     | 13.465                                | 13.473                               | 0.008             |
| Mo <sub>15</sub>     | 13.501                                | 13.474                               | -0.027            |
| Mo <sub>16</sub>     | 13.594                                | 13.494                               | -0.100            |
| Mo <sub>20</sub>     | 13.521                                | 13.602                               | 0.082             |
| Mo <sub>24</sub>     | 13.396                                | 13.425                               | 0.029             |
| C <sub>4</sub>       | 5.450                                 | 5.499                                | 0.049             |
| C <sub>7</sub>       | 5.543                                 | 5.600                                | 0.057             |
| C <sub>8</sub>       | 5.220                                 | 5.238                                | 0.018             |
| B                    | 2.419                                 | 2.207                                | -0.212            |
| H                    | 1                                     | 1.438                                | 0.438             |



**Table S7** Bader charges analysis before and after H<sup>\*</sup> adsorption in B, N-Mo<sub>2</sub>C.

| Atomic number    | Bader charge before adsorption | Bader charge after adsorption | Net charge |
|------------------|--------------------------------|-------------------------------|------------|
| Mo <sub>3</sub>  | 13.400                         | 13.381                        | -0.019     |
| Mo <sub>4</sub>  | 13.741                         | 13.724                        | -0.017     |
| Mo <sub>7</sub>  | 13.153                         | 13.133                        | -0.020     |
| Mo <sub>8</sub>  | 13.548                         | 13.476                        | -0.072     |
| Mo <sub>11</sub> | 13.241                         | 13.228                        | -0.013     |
| Mo <sub>12</sub> | 13.329                         | 13.244                        | -0.086     |
| Mo <sub>15</sub> | 13.232                         | 13.231                        | -0.001     |
| Mo <sub>16</sub> | 13.582                         | 13.502                        | -0.080     |
| Mo <sub>19</sub> | 13.170                         | 13.141                        | -0.028     |
| Mo <sub>20</sub> | 13.426                         | 13.431                        | 0.005      |
| Mo <sub>23</sub> | 13.269                         | 13.290                        | 0.020      |
| Mo <sub>24</sub> | 13.378                         | 13.412                        | 0.035      |
| C <sub>4</sub>   | 5.327                          | 5.285                         | -0.042     |
| C <sub>11</sub>  | 5.256                          | 5.257                         | 0.001      |
| N                | 6.513                          | 6.514                         | 0.001      |
| B <sub>1</sub>   | 3.137                          | 3.075                         | -0.062     |
| H                | 1                              | 1.379                         | 0.379      |

**References**

1. S. Wu, M. Chen, W. Wang, J. Zhou, X. Tang, D. Zhou and C. Liu, *Carbon*, 2021, **171**, 385-394.
2. C. He, Y. Cai, Z. Ma, X. Zhong, H. Wang, Q. Li and Y. Huang, *ACS Appl. Nano Mater.*, 2021, **4**, 8897-8905.
